# Supplementary material for: OmicScope unravels systems-level insights from quantitative proteomics data
Source: PubMed Central journal article supplement — Nat Commun. 2024 Aug 2;15:6510. doi: 10.1038/s41467-024-50875-z (PMC11297029; doi:10.1038/s41467-024-50875-z), 2024-08-02
Supplement: 41467_2024_50875_MOESM3_ESM.pdf [file 41467_2024_50875_MOESM3_ESM.pdf]

## **Description of Additional Supplementary Files:**

**Supplementary Data 1:** Survey of proteomics computational tools to perform downstream data analysis. This survey evaluated fifteen computational tools used for downstream proteomics data analysis based on their features, including user interface design, input formats, preprocessing steps, experimental designs for differential proteomics analysis, enrichment capabilities, meta-analysis approaches, types of figures generated, available export formats, and availability of source code.

**Supplementary Data 2:** OmicScope features for each import method. Due to the diversity of data available in the proteomics field, OmicScope applies various approaches and functions to handle each type of data method.
